# Supplementary material for: Comparison of Metabolomic Profiles of Organs in Mice of Different Strains Based on SPME-LC-HRMS
Source: PubMed Central journal article supplement (PMC7345432; doi:10.3390/metabo10060255), 2020-06-17
Supplement: metabolites-10-00255-s001.pdf [file metabolites-10-00255-s001.pdf]

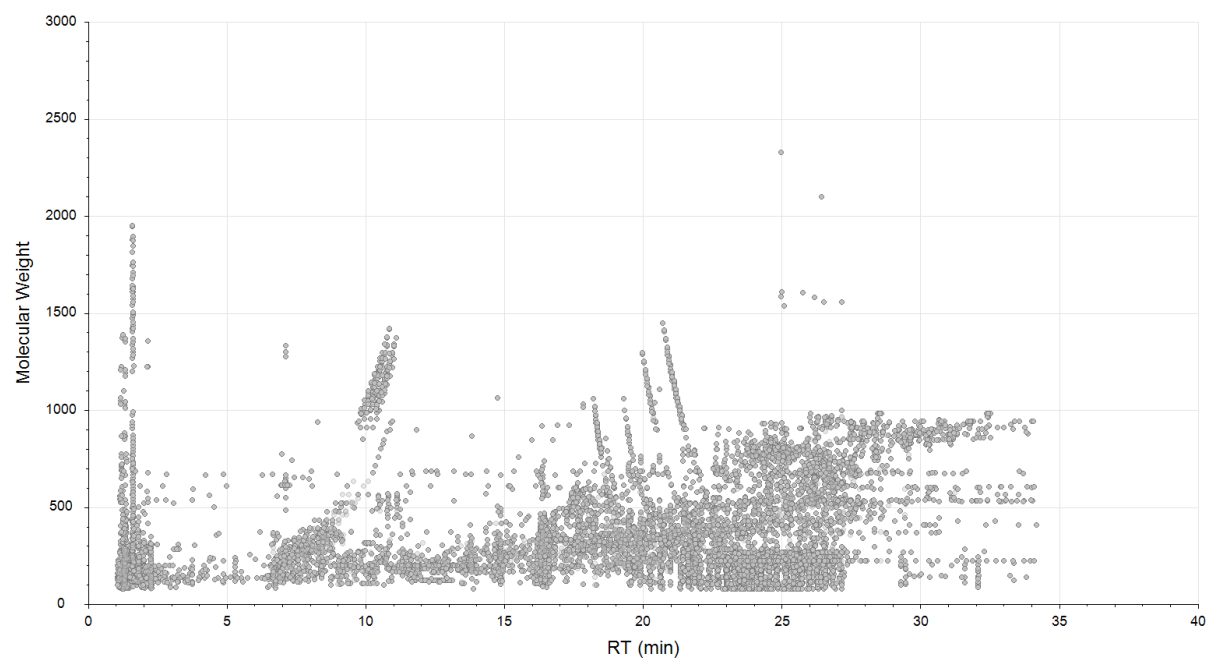

**Figure S1.** Ion map (molecular weight versus retention time) of all extracted metabolites following LC-MS analysis in positive ionization mode.

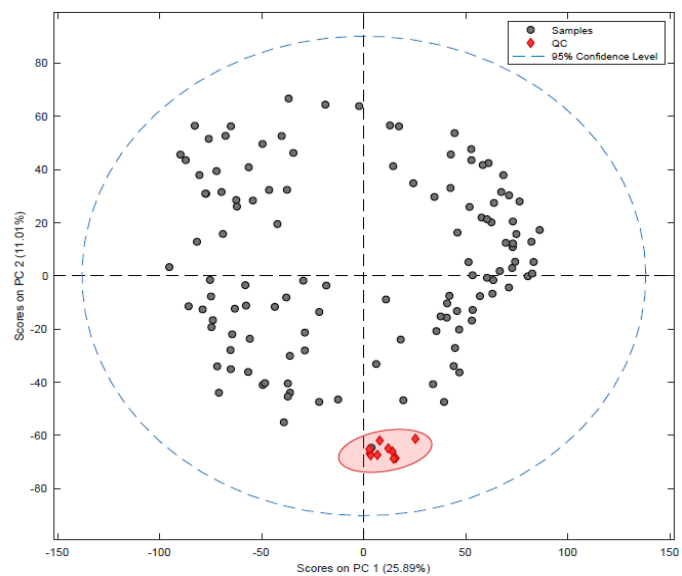

**Figure S2.** Principal component analysis (PCA) plot of all analyzed samples and extraction quality control (QC) samples.

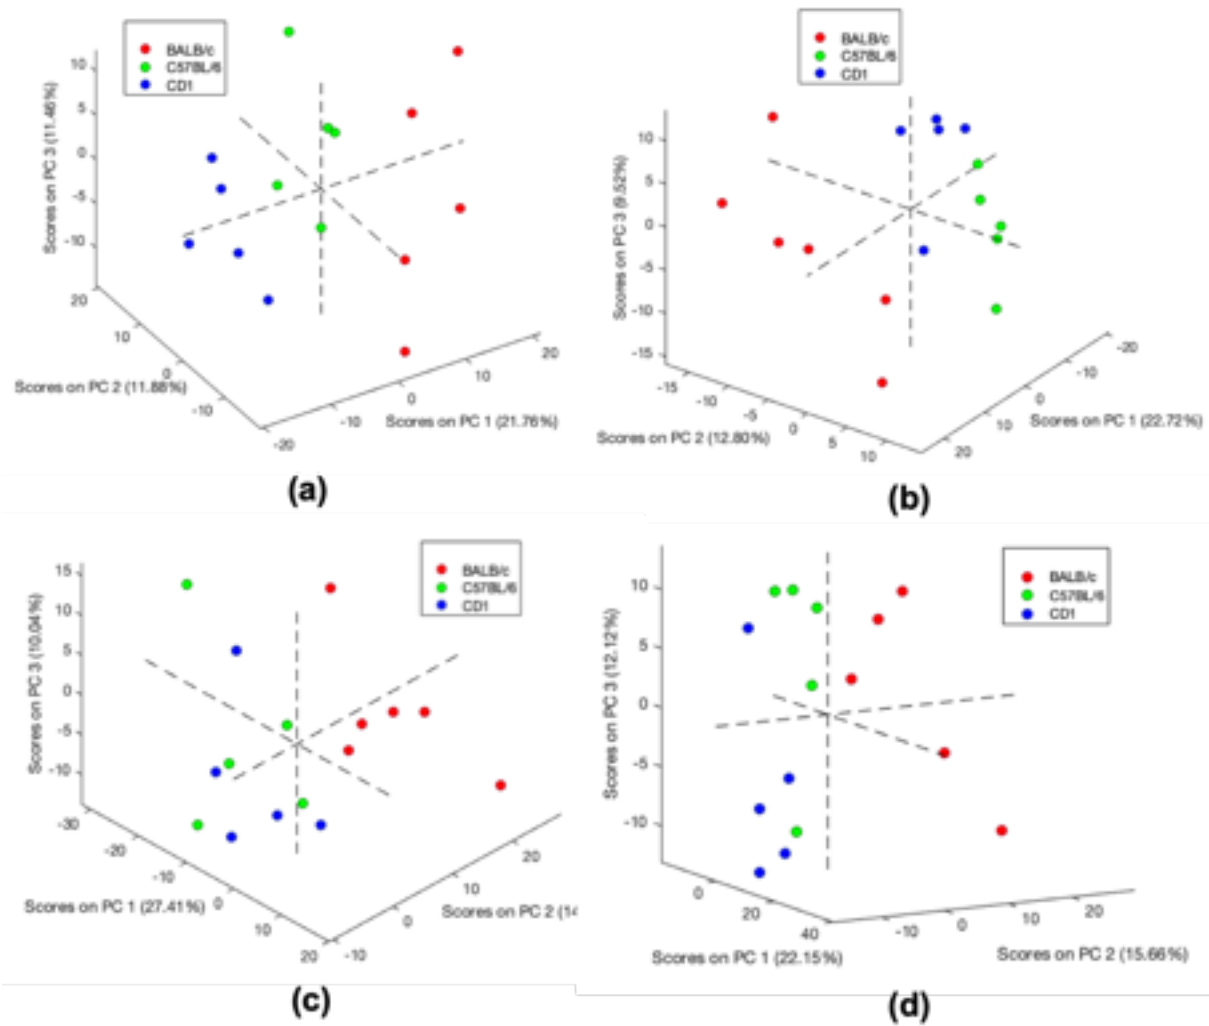

**Figure S3.** 3D PCA score plots of untargeted metabolomics data of tissues collected from three different mouse strains. Examined strains included: BALB/c (red), C57BL/6 (green), and CD1 (blue). Tissues analyzed included: brain (a), liver (b), kidney (c), and muscle (d).

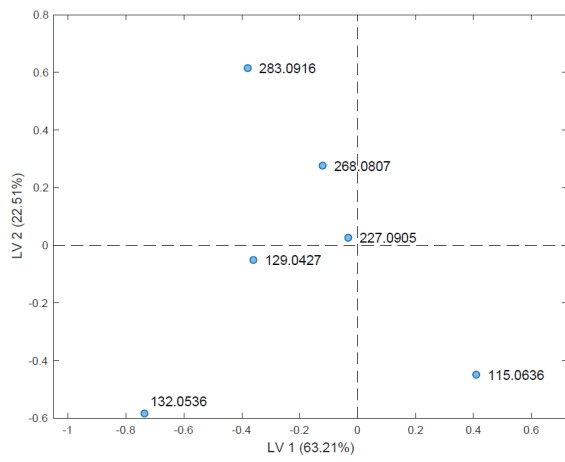

(a)

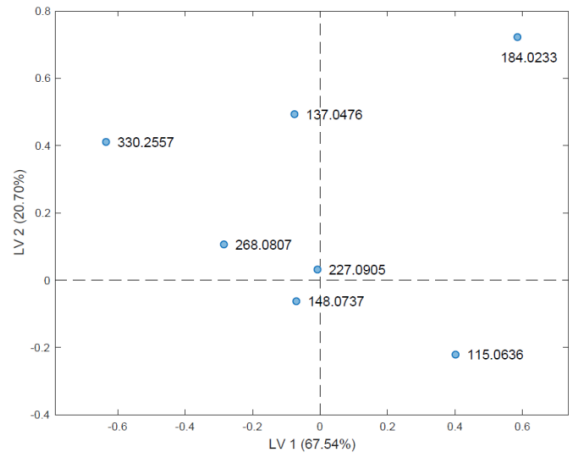

(b)

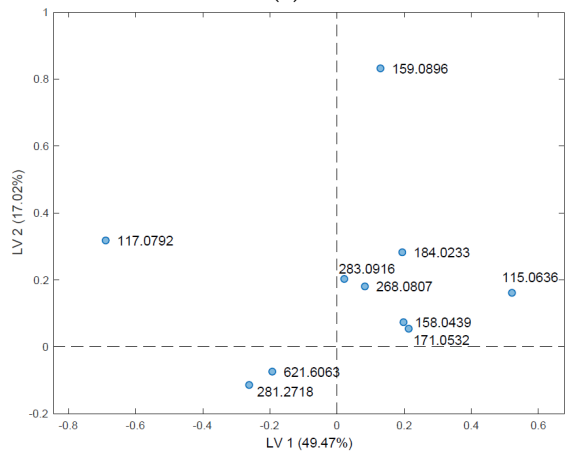

(c)

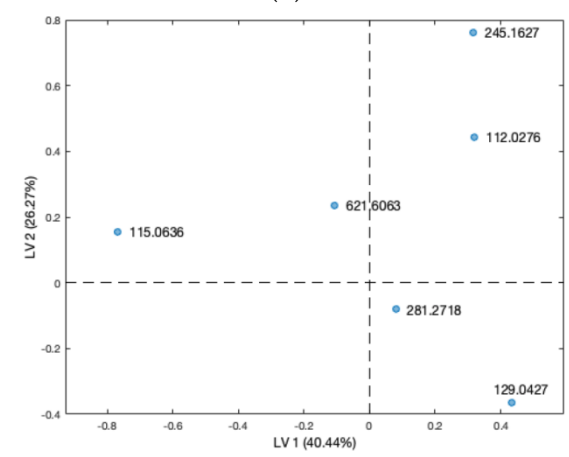

(d)

**Figure S4.** Loadings plots of PLS-DA. Tissues analyzed were: brain (a), liver (b), kidney (c), muscle (d).

Table S1. The list of detected features

| m/z      | Adduct               | Polarity | Charge State | Retention time |
|----------|----------------------|----------|--------------|----------------|
| 81.5212  | M+H                  | +        | 1            | 2.25           |
| 88.0237  | M+2H                 | +        | 2            | 2.26           |
| 90.5264  | M+H                  | +        | 1            | 2.26           |
| 94.5460  | M+2H                 | +        | 2            | 6.55           |
| 96.5313  | M+H                  | +        | 1            | 1.27           |
| 98.0607  | M+H                  | +        | 1            | 6.76           |
| 98.9846  | M+H                  | +        | 1            | 18.26          |
| 100.9572 | M+H                  | +        | 1            | 2.28           |
| 101.0238 | M+2H                 | +        | 2            | 2.84           |
| 102.5328 | M+H                  | +        | 1            | 24.77          |
| 103.5208 | M+H                  | +        | 1            | 1.29           |
| 104.0709 | M+H                  | +        | 1            | 1.27           |
| 104.9666 | M+H-H <sub>2</sub> O | +        | 1            | 2.25           |
| 105.0038 | M+H                  | +        | 1            | 1.27           |
| 105.0339 | M+H                  | +        | 1            | 9.01           |
| 107.0707 | M+H                  | +        | 1            | 10.30          |
| 112.0066 | M+H                  | +        | 1            | 2.27           |
| 113.0348 | M+H                  | +        | 1            | 1.34           |
| 114.0553 | M+H                  | +        | 1            | 1.30           |
| 115.0505 | M+H-H <sub>2</sub> O | +        | 1            | 1.28           |
| 115.5574 | M+H                  | +        | 1            | 13.46          |
| 116.0709 | M+H                  | +        | 1            | 1.83           |
| 116.9721 | M+H                  | +        | 1            | 2.26           |
| 117.9799 | M+H                  | +        | 1            | 2.26           |
| 118.0654 | M+H                  | +        | 1            | 21.64          |
| 118.0865 | M+H                  | +        | 1            | 1.29           |
| 120.9651 | M+H                  | +        | 1            | 2.26           |
| 121.0285 | M+H                  | +        | 1            | 19.89          |
| 124.1123 | M+H                  | +        | 1            | 9.60           |
| 124.9558 | M+H                  | +        | 1            | 1.14           |
| 125.9724 | M+H                  | +        | 1            | 2.26           |
| 125.9865 | M+H                  | +        | 1            | 2.25           |
| 126.0552 | M+H                  | +        | 1            | 7.63           |
| 128.9861 | M+H                  | +        | 1            | 1.30           |
| 129.0700 | M+H                  | +        | 1            | 20.45          |
| 130.0499 | M+H                  | +        | 1            | 1.20           |
| 130.9653 | M+H                  | +        | 1            | 2.26           |
| 131.0492 | M+H                  | +        | 1            | 9.08           |
| 131.0704 | M+H-H <sub>2</sub> O | +        | 1            | 1.33           |
| 133.0610 | M+H                  | +        | 1            | 1.20           |
| 137.0458 | M+H                  | +        | 1            | 1.33           |
| 137.0459 | M+H                  | +        | 1            | 6.68           |
| 137.0459 | M+H                  | +        | 1            | 3.28           |
| 137.0459 | M+H                  | +        | 1            | 6.90           |
| 138.0548 | M+H                  | +        | 1            | 1.34           |

|          |                      |   |   |       |
|----------|----------------------|---|---|-------|
| 140.0106 | M+H                  | + | 1 | 18.26 |
| 140.0429 | M+Na                 | + | 1 | 1.71  |
| 141.0658 | M+H                  | + | 1 | 6.95  |
| 142.1227 | M+H                  | + | 1 | 9.59  |
| 144.1019 | M+ACN+H              | + | 1 | 1.31  |
| 145.0346 | M+H                  | + | 1 | 1.36  |
| 146.0813 | M+H-H <sub>2</sub> O | + | 1 | 1.33  |
| 146.9966 | M+H                  | + | 1 | 1.30  |
| 147.1168 | M+H                  | + | 1 | 23.95 |
| 148.9758 | M+H                  | + | 1 | 2.25  |
| 149.0233 | M+H                  | + | 1 | 19.89 |
| 151.0966 | M+H                  | + | 1 | 1.34  |
| 152.1434 | M+NH <sub>4</sub>    | + | 1 | 11.87 |
| 153.0406 | M+H                  | + | 1 | 1.34  |
| 153.0407 | M+H                  | + | 1 | 3.24  |
| 153.0658 | M+H                  | + | 1 | 1.34  |
| 154.0498 | M+H                  | + | 1 | 1.34  |
| 155.0539 | M+H                  | + | 1 | 1.27  |
| 159.0278 | M+H                  | + | 1 | 3.23  |
| 159.0511 | M+H                  | + | 1 | 1.15  |
| 160.0969 | M+H                  | + | 1 | 7.68  |
| 161.0118 | M+K                  | + | 1 | 1.31  |
| 161.0598 | M+H                  | + | 1 | 21.69 |
| 161.9611 | M+H                  | + | 1 | 1.28  |
| 163.9402 | M+H                  | + | 1 | 1.26  |
| 164.9481 | M+H-H <sub>2</sub> O | + | 1 | 1.26  |
| 165.0071 | M+H-H <sub>2</sub> O | + | 1 | 1.34  |
| 167.6150 | M+H                  | + | 1 | 16.40 |
| 169.0583 | M+H                  | + | 1 | 1.21  |
| 170.0326 | M+H                  | + | 1 | 2.13  |
| 170.1176 | M+H                  | + | 1 | 9.58  |
| 170.1540 | M+H                  | + | 1 | 11.87 |
| 171.0997 | M+H                  | + | 1 | 18.33 |
| 172.0457 | M+ACN+H              | + | 1 | 1.28  |
| 172.1154 | M+H                  | + | 1 | 20.88 |
| 172.1332 | M+H                  | + | 1 | 9.86  |
| 172.1695 | M+H                  | + | 1 | 14.92 |
| 174.1125 | M+H                  | + | 1 | 9.91  |
| 174.1238 | M+H                  | + | 1 | 9.45  |
| 174.6018 | M+H                  | + | 1 | 14.94 |
| 174.6103 | M+H                  | + | 1 | 13.81 |
| 176.0553 | M+H                  | + | 1 | 1.36  |
| 176.0554 | M+H                  | + | 1 | 2.11  |
| 176.9842 | M+H                  | + | 1 | 1.31  |
| 177.0548 | M+H                  | + | 1 | 16.35 |
| 177.1638 | M+H-H <sub>2</sub> O | + | 1 | 19.12 |
| 178.1227 | M+H-H <sub>2</sub> O | + | 1 | 13.53 |
| 180.0656 | M+H                  | + | 1 | 9.02  |

|          |                      |   |   |       |
|----------|----------------------|---|---|-------|
| 180.1595 | M+H                  | + | 1 | 7.46  |
| 180.1748 | M+NH <sub>4</sub>    | + | 1 | 13.81 |
| 181.0529 | M+H                  | + | 1 | 1.32  |
| 181.1224 | M+H                  | + | 1 | 14.86 |
| 182.5991 | M+H                  | + | 1 | 13.83 |
| 184.1698 | M+H                  | + | 1 | 12.89 |
| 185.0305 | M+H                  | + | 1 | 1.35  |
| 185.1148 | M+H                  | + | 1 | 10.34 |
| 186.1489 | M+H                  | + | 1 | 17.65 |
| 186.9809 | M+H                  | + | 1 | 2.26  |
| 188.0231 | M+H-H <sub>2</sub> O | + | 1 | 1.32  |
| 189.0871 | M+NH <sub>4</sub>    | + | 1 | 1.38  |
| 190.0710 | M+H+MeOH             | + | 1 | 1.36  |
| 190.5996 | M+H                  | + | 1 | 15.30 |
| 190.9638 | M+H                  | + | 1 | 1.36  |
| 191.0855 | M+H                  | + | 1 | 18.47 |
| 191.1042 | M+H                  | + | 1 | 12.38 |
| 191.1795 | M+H                  | + | 1 | 16.12 |
| 192.0944 | M+H                  | + | 1 | 19.88 |
| 194.0814 | M+H                  | + | 1 | 9.56  |
| 195.1018 | M+H                  | + | 1 | 19.30 |
| 195.1228 | M+H                  | + | 1 | 1.34  |
| 196.1543 | M+H                  | + | 1 | 1.36  |
| 197.6170 | M+2H                 | + | 2 | 16.38 |
| 198.0372 | M+H                  | + | 1 | 2.13  |
| 198.1488 | M+H                  | + | 1 | 11.86 |
| 198.1853 | M+H                  | + | 1 | 13.81 |
| 198.1854 | M+H                  | + | 1 | 16.48 |
| 199.0936 | M+2H                 | + | 2 | 16.32 |
| 199.0940 | M+H                  | + | 1 | 11.07 |
| 199.1694 | M+H                  | + | 1 | 20.42 |
| 200.2010 | M+H                  | + | 1 | 17.43 |
| 200.9724 | M+H                  | + | 1 | 1.13  |
| 203.1066 | M+H                  | + | 1 | 16.32 |
| 204.9795 | M+H+MeOH             | + | 1 | 1.29  |
| 205.9873 | M+H                  | + | 1 | 1.33  |
| 206.1389 | M+ACN+H              | + | 1 | 1.31  |
| 207.1743 | M+H                  | + | 1 | 19.83 |
| 207.1743 | M+H                  | + | 1 | 18.62 |
| 207.1746 | M+H                  | + | 1 | 19.31 |
| 208.0693 | M+H                  | + | 1 | 19.89 |
| 208.1308 | M+Na                 | + | 1 | 11.30 |
| 209.0885 | M+H                  | + | 1 | 19.90 |
| 209.1366 | M+H                  | + | 1 | 11.57 |
| 209.1384 | M+H                  | + | 1 | 1.29  |
| 209.1900 | M+H                  | + | 1 | 18.76 |
| 210.1101 | M+H                  | + | 1 | 9.60  |
| 210.1699 | M+H                  | + | 1 | 1.34  |

|          |                      |   |   |       |
|----------|----------------------|---|---|-------|
| 211.0940 | M+H                  | + | 1 | 10.70 |
| 211.1095 | M+H                  | + | 1 | 18.26 |
| 211.2056 | M+H                  | + | 1 | 23.47 |
| 212.1258 | M+H                  | + | 1 | 9.84  |
| 212.1645 | M+H                  | + | 1 | 12.86 |
| 212.6110 | M+2H                 | + | 2 | 19.47 |
| 213.1849 | M+H                  | + | 1 | 21.89 |
| 213.9797 | M+H                  | + | 1 | 1.30  |
| 214.1801 | M+H                  | + | 1 | 13.82 |
| 214.2166 | M+H                  | + | 1 | 18.26 |
| 215.1254 | M+H                  | + | 1 | 8.67  |
| 216.1959 | M+H                  | + | 1 | 12.86 |
| 216.9507 | M+H                  | + | 1 | 2.26  |
| 217.1046 | M+Na                 | + | 1 | 7.24  |
| 217.1434 | M+H                  | + | 1 | 13.55 |
| 217.1589 | M+H                  | + | 1 | 20.44 |
| 217.1951 | M+H                  | + | 1 | 20.15 |
| 218.9587 | M+H-H <sub>2</sub> O | + | 1 | 1.39  |
| 219.1743 | M+H                  | + | 1 | 17.25 |
| 219.1745 | M+H                  | + | 1 | 19.33 |
| 219.2106 | M+H                  | + | 1 | 23.95 |
| 219.6068 | M+H                  | + | 1 | 16.32 |
| 220.1178 | M+H                  | + | 1 | 1.35  |
| 220.1180 | M+H                  | + | 1 | 7.10  |
| 220.1181 | M+H+MeOH             | + | 1 | 1.33  |
| 220.5964 | M+H                  | + | 1 | 19.89 |
| 221.1537 | M+H                  | + | 1 | 20.64 |
| 222.1464 | M+Na                 | + | 1 | 12.62 |
| 223.0965 | M+H                  | + | 1 | 16.35 |
| 224.1257 | M+H                  | + | 1 | 10.75 |
| 225.9144 | M+H                  | + | 1 | 1.63  |
| 226.1800 | M+NH <sub>4</sub>    | + | 1 | 21.87 |
| 226.1801 | M+H-H <sub>2</sub> O | + | 1 | 13.83 |
| 227.0113 | M+ACN+H              | + | 1 | 1.36  |
| 227.9952 | M+H                  | + | 1 | 1.28  |
| 228.1206 | M+H                  | + | 1 | 7.03  |
| 228.2323 | M+H                  | + | 1 | 19.02 |
| 230.1569 | M+2H                 | + | 2 | 19.92 |
| 230.9825 | M+H                  | + | 1 | 1.28  |
| 231.1204 | M+H                  | + | 1 | 7.78  |
| 231.1227 | M+H                  | + | 1 | 9.75  |
| 231.1591 | M+H                  | + | 1 | 14.50 |
| 232.1909 | M+H                  | + | 1 | 14.04 |
| 232.9281 | M+H                  | + | 1 | 2.26  |
| 233.0783 | M+H                  | + | 1 | 12.10 |
| 233.9821 | M+H                  | + | 1 | 1.43  |
| 234.1620 | M+H                  | + | 1 | 17.30 |
| 235.1691 | M+H                  | + | 1 | 19.48 |



|          |                      |   |   |       |
|----------|----------------------|---|---|-------|
| 235.2055 | M+H                  | + | 1 | 20.51 |
| 237.6605 | M+2H                 | + | 2 | 22.62 |
| 238.1204 | M+H                  | + | 1 | 12.58 |
| 238.1776 | M+H                  | + | 1 | 12.86 |
| 238.1984 | M+H                  | + | 1 | 19.76 |
| 238.2165 | M+H                  | + | 1 | 15.84 |
| 239.1488 | M+H                  | + | 1 | 7.68  |
| 239.1620 | M+2H                 | + | 2 | 19.91 |
| 239.2370 | M+H                  | + | 1 | 26.03 |
| 240.1442 | 2M+ACN+Na            | + | 1 | 1.39  |
| 240.1804 | M+H                  | + | 1 | 1.33  |
| 241.0309 | M+H                  | + | 1 | 1.15  |
| 242.1136 | M+2H                 | + | 2 | 18.69 |
| 242.1751 | M+H                  | + | 1 | 21.87 |
| 242.2479 | M+H                  | + | 1 | 19.77 |
| 243.1355 | M+Na                 | + | 1 | 19.11 |
| 243.1356 | M+H                  | + | 1 | 19.10 |
| 243.2106 | M+H                  | + | 1 | 23.95 |
| 244.2272 | M+H                  | + | 1 | 16.75 |
| 245.0767 | M+H-H <sub>2</sub> O | + | 1 | 1.28  |
| 245.1746 | M+H                  | + | 1 | 15.34 |
| 246.1700 | M+H                  | + | 1 | 17.87 |
| 246.9048 | M+H                  | + | 1 | 2.26  |
| 247.1693 | M+H                  | + | 1 | 14.84 |
| 247.1780 | M+Na                 | + | 1 | 15.22 |
| 248.9003 | 2M+Na                | + | 1 | 2.24  |
| 249.1824 | M+Na                 | + | 1 | 17.34 |
| 250.0797 | M+Na                 | + | 1 | 7.04  |
| 250.1187 | M+H                  | + | 1 | 17.43 |
| 250.9999 | M+H                  | + | 1 | 16.94 |
| 251.0468 | M+H                  | + | 1 | 21.14 |
| 252.1360 | M+H                  | + | 1 | 13.74 |
| 252.1569 | M+H                  | + | 1 | 12.90 |
| 253.1645 | M+H                  | + | 1 | 8.22  |
| 253.9093 | M+H                  | + | 1 | 1.60  |
| 254.1960 | M+H                  | + | 1 | 1.29  |
| 254.1961 | M+H                  | + | 1 | 7.78  |
| 254.2114 | M+H                  | + | 1 | 15.43 |
| 255.0288 | M+ACN+H              | + | 1 | 1.34  |
| 255.1589 | M+H                  | + | 1 | 15.63 |
| 256.1755 | M+H                  | + | 1 | 7.70  |
| 256.2270 | M+H                  | + | 1 | 22.75 |
| 256.2635 | M+H                  | + | 1 | 20.29 |
| 257.2303 | M+H                  | + | 1 | 22.73 |
| 257.2305 | M+H                  | + | 1 | 16.66 |
| 258.2427 | M+H                  | + | 1 | 17.16 |
| 259.2055 | M+H                  | + | 1 | 21.11 |
| 261.1306 | M+H                  | + | 1 | 7.69  |

|          |          |   |   |       |
|----------|----------|---|---|-------|
| 261.1849 | M+H      | + | 1 | 20.05 |
| 261.2171 | M+H      | + | 1 | 11.86 |
| 262.1436 | M+H      | + | 1 | 16.31 |
| 262.1776 | M+H      | + | 1 | 15.45 |
| 265.1046 | M+H      | + | 1 | 15.36 |
| 267.1567 | M+H      | + | 1 | 10.16 |
| 267.1721 | M+H      | + | 1 | 18.27 |
| 268.2271 | M+H      | + | 1 | 17.05 |
| 269.0879 | M+H      | + | 1 | 1.34  |
| 269.1747 | M+H      | + | 1 | 16.54 |
| 269.2112 | M+H      | + | 1 | 18.17 |
| 269.2589 | M+H      | + | 1 | 19.76 |
| 270.2429 | M+H      | + | 1 | 17.34 |
| 270.2792 | M+H      | + | 1 | 20.77 |
| 271.2267 | M+H      | + | 1 | 18.23 |
| 272.2219 | M+H      | + | 1 | 18.16 |
| 272.2219 | M+H      | + | 1 | 15.43 |
| 272.2220 | M+H      | + | 1 | 22.52 |
| 272.2583 | M+H      | + | 1 | 21.98 |
| 272.2584 | M+H      | + | 1 | 18.21 |
| 274.9719 | M+H      | + | 1 | 1.40  |
| 275.0482 | M+H      | + | 1 | 8.47  |
| 275.1101 | M+H      | + | 1 | 7.87  |
| 275.1464 | M+H      | + | 1 | 8.24  |
| 276.1934 | M+H      | + | 1 | 16.28 |
| 277.1028 | M+H+MeOH | + | 1 | 1.36  |
| 277.2164 | M+H      | + | 1 | 19.21 |
| 277.9719 | M+H      | + | 1 | 1.33  |
| 278.2115 | M+H      | + | 1 | 19.20 |
| 279.0934 | M+H      | + | 1 | 15.10 |
| 279.1588 | M+H      | + | 1 | 19.89 |
| 279.2043 | M+H      | + | 1 | 13.18 |
| 279.9694 | M+ACN+H  | + | 1 | 23.88 |
| 280.1676 | M+H      | + | 1 | 15.77 |
| 281.1536 | M+H      | + | 1 | 23.07 |
| 281.1721 | M+H      | + | 1 | 18.97 |
| 281.1724 | M+H      | + | 1 | 19.33 |
| 282.1464 | M+H      | + | 1 | 13.83 |
| 282.2791 | M+H      | + | 1 | 20.64 |
| 284.0579 | M+H      | + | 1 | 11.33 |
| 284.0986 | M+H      | + | 1 | 1.33  |
| 284.0988 | M+H      | + | 1 | 6.93  |
| 284.2066 | M+H      | + | 1 | 7.68  |
| 284.2066 | M+H      | + | 1 | 1.29  |
| 284.2585 | M+H      | + | 1 | 18.06 |
| 285.0829 | M+H      | + | 1 | 1.33  |
| 286.2740 | M+H      | + | 1 | 18.59 |
| 288.2531 | M+H      | + | 1 | 16.44 |

|          |         |   |   |       |
|----------|---------|---|---|-------|
| 289.1540 | M+H     | + | 1 | 18.26 |
| 289.2483 | M+H     | + | 1 | 13.83 |
| 290.2094 | M+H     | + | 1 | 17.06 |
| 290.6746 | M+2H    | + | 2 | 24.48 |
| 291.0699 | M+H     | + | 1 | 6.68  |
| 291.1951 | M+H     | + | 1 | 18.61 |
| 291.2291 | M+H     | + | 1 | 19.60 |
| 292.2847 | M+H     | + | 1 | 19.30 |
| 295.2266 | M+H     | + | 1 | 13.77 |
| 297.0824 | M+H     | + | 1 | 25.21 |
| 297.2400 | M+H     | + | 1 | 19.29 |
| 298.0974 | M+ACN+H | + | 1 | 14.89 |
| 298.2223 | M+H     | + | 1 | 8.22  |
| 298.3100 | M+H     | + | 1 | 21.74 |
| 298.3102 | M+H     | + | 1 | 22.17 |
| 299.1100 | M+H     | + | 1 | 13.44 |
| 299.1853 | M+H     | + | 1 | 15.29 |
| 299.2004 | M+H     | + | 1 | 15.83 |
| 300.2015 | M+H     | + | 1 | 8.16  |
| 304.8942 | M+H     | + | 1 | 1.60  |
| 308.0887 | M+H     | + | 1 | 19.17 |
| 308.0890 | M+H     | + | 1 | 18.84 |
| 308.2796 | M+H     | + | 1 | 17.74 |
| 309.1307 | M+H     | + | 1 | 15.66 |
| 309.1828 | M+H     | + | 1 | 16.36 |
| 309.2034 | M+H     | + | 1 | 20.42 |
| 311.1465 | M+H     | + | 1 | 13.66 |
| 311.1642 | M+H     | + | 1 | 22.97 |
| 311.1855 | M+H     | + | 1 | 16.37 |
| 311.2556 | M+H     | + | 1 | 19.92 |
| 312.1481 | M+H     | + | 1 | 14.88 |
| 312.2383 | M+H     | + | 1 | 8.82  |
| 312.3262 | M+H     | + | 1 | 22.77 |
| 313.2349 | M+H     | + | 1 | 17.74 |
| 313.2735 | M+H     | + | 1 | 20.37 |
| 314.2172 | M+NH4   | + | 1 | 8.61  |
| 314.2691 | M+H     | + | 1 | 20.05 |
| 315.1777 | M+H     | + | 1 | 12.08 |
| 317.1151 | M+H     | + | 1 | 19.90 |
| 317.2085 | M+H     | + | 1 | 18.80 |
| 318.1961 | M+2H    | + | 2 | 9.57  |
| 318.2064 | M+H     | + | 1 | 16.33 |
| 319.1727 | M+H     | + | 1 | 8.63  |
| 319.2844 | M+H     | + | 1 | 14.91 |
| 321.2213 | M+H     | + | 1 | 26.40 |
| 322.2715 | M+H     | + | 1 | 18.04 |
| 323.1640 | M+H     | + | 1 | 13.83 |
| 323.1827 | M+H     | + | 1 | 16.14 |

|          |      |   |   |       |
|----------|------|---|---|-------|
| 327.2529 | M+H  | + | 1 | 25.30 |
| 328.2329 | M+H  | + | 1 | 9.18  |
| 329.2321 | M+H  | + | 1 | 23.64 |
| 330.1804 | M+H  | + | 1 | 18.26 |
| 331.2090 | M+H  | + | 1 | 10.87 |
| 331.2629 | M+H  | + | 1 | 21.65 |
| 334.1938 | M+H  | + | 1 | 24.53 |
| 334.2226 | M+H  | + | 1 | 15.72 |
| 334.3102 | M+H  | + | 1 | 21.41 |
| 337.1046 | M+H  | + | 1 | 18.22 |
| 337.2347 | M+Na | + | 1 | 16.31 |
| 338.3415 | M+H  | + | 1 | 22.62 |
| 339.1541 | M+H  | + | 1 | 16.32 |
| 339.2868 | M+Na | + | 1 | 21.41 |
| 341.2665 | M+Na | + | 1 | 19.19 |
| 342.1676 | M+H  | + | 1 | 19.90 |
| 342.2485 | M+H  | + | 1 | 8.61  |
| 343.1481 | M+H  | + | 1 | 19.46 |
| 343.2841 | M+H  | + | 1 | 21.71 |
| 344.2278 | M+H  | + | 1 | 8.43  |
| 344.7335 | M+2H | + | 2 | 26.12 |
| 345.2265 | M+H  | + | 1 | 16.39 |
| 347.3156 | M+3H | + | 3 | 20.44 |
| 348.0700 | M+H  | + | 1 | 1.36  |
| 349.1832 | M+H  | + | 1 | 8.44  |
| 350.2663 | M+Na | + | 1 | 19.85 |
| 353.1744 | M+H  | + | 1 | 14.84 |
| 353.2086 | M+H  | + | 1 | 16.30 |
| 353.2089 | M+H  | + | 1 | 16.61 |
| 353.2663 | M+H  | + | 1 | 19.13 |
| 353.2689 | M+H  | + | 1 | 18.31 |
| 353.3047 | M+2H | + | 2 | 22.65 |
| 355.0698 | M+H  | + | 1 | 26.82 |
| 355.0698 | M+H  | + | 1 | 27.50 |
| 355.0701 | M+H  | + | 1 | 25.95 |
| 355.2059 | M+H  | + | 1 | 16.39 |
| 355.2456 | M+Na | + | 1 | 19.54 |
| 355.2822 | M+Na | + | 1 | 19.74 |
| 355.2842 | M+H  | + | 1 | 25.84 |
| 356.2642 | M+H  | + | 1 | 9.19  |
| 357.2997 | M+H  | + | 1 | 22.19 |
| 359.0686 | M+H  | + | 1 | 19.88 |
| 360.3107 | M+H  | + | 1 | 16.39 |
| 361.0776 | M+2H | + | 2 | 1.21  |
| 361.3140 | M+H  | + | 1 | 16.38 |
| 362.1780 | M+H  | + | 1 | 21.53 |
| 363.2199 | M+H  | + | 1 | 18.69 |
| 365.1357 | M+H  | + | 1 | 19.78 |

|          |      |   |   |       |
|----------|------|---|---|-------|
| 365.2153 | M+H  | + | 1 | 18.70 |
| 366.3730 | M+H  | + | 1 | 22.70 |
| 367.3357 | M+H  | + | 1 | 19.91 |
| 369.2609 | M+Na | + | 1 | 20.99 |
| 370.3549 | M+H  | + | 1 | 24.78 |
| 371.1010 | M+H  | + | 1 | 28.56 |
| 371.3155 | M+H  | + | 1 | 22.64 |
| 372.3474 | M+H  | + | 1 | 18.00 |
| 375.2505 | M+H  | + | 1 | 19.31 |
| 376.1934 | M+H  | + | 1 | 21.14 |
| 377.2144 | M+H  | + | 1 | 8.78  |
| 377.2146 | M+H  | + | 1 | 9.48  |
| 377.2294 | M+H  | + | 1 | 22.04 |
| 378.2979 | M+H  | + | 1 | 20.87 |
| 380.3371 | M+H  | + | 1 | 19.13 |
| 381.3723 | M+H  | + | 1 | 26.96 |
| 383.2649 | M+H  | + | 1 | 21.52 |
| 383.3154 | M+H  | + | 1 | 26.33 |
| 384.3475 | M+H  | + | 1 | 21.83 |
| 385.2018 | M+H  | + | 1 | 18.68 |
| 385.2922 | M+H  | + | 1 | 18.99 |
| 388.2542 | M+H  | + | 1 | 8.13  |
| 390.2093 | M+H  | + | 1 | 22.54 |
| 393.2094 | M+H  | + | 1 | 8.76  |
| 393.2200 | M+H  | + | 1 | 21.53 |
| 393.2975 | M+H  | + | 1 | 23.58 |
| 394.3529 | M+H  | + | 1 | 19.67 |
| 395.2202 | M+H  | + | 1 | 21.53 |
| 397.2921 | M+H  | + | 1 | 22.10 |
| 397.4038 | M+H  | + | 1 | 26.57 |
| 399.2111 | M+H  | + | 1 | 22.06 |
| 399.2507 | M+H  | + | 1 | 18.77 |
| 399.2719 | M+Na | + | 1 | 19.44 |
| 399.3080 | M+Na | + | 1 | 19.67 |
| 399.3584 | M+H  | + | 1 | 20.51 |
| 399.7642 | M+2H | + | 2 | 22.65 |
| 404.1378 | M+H  | + | 1 | 19.89 |
| 404.3133 | M+Na | + | 1 | 21.15 |
| 405.3401 | M+H  | + | 1 | 16.35 |
| 406.3291 | M+H  | + | 1 | 21.82 |
| 407.1837 | M+H  | + | 1 | 18.69 |
| 407.3323 | M+H  | + | 1 | 22.55 |
| 409.3677 | M+H  | + | 1 | 24.29 |
| 410.2226 | M+H  | + | 1 | 21.52 |
| 411.0936 | M+Na | + | 1 | 19.49 |
| 413.2895 | M+H  | + | 1 | 20.12 |
| 415.1905 | 2M+H | + | 1 | 16.32 |
| 415.2326 | M+H  | + | 1 | 14.70 |

|          |      |   |   |       |
|----------|------|---|---|-------|
| 416.3523 | M+H  | + | 1 | 23.04 |
| 417.3366 | M+H  | + | 1 | 20.23 |
| 419.2773 | M+H  | + | 1 | 19.22 |
| 420.1689 | M+H  | + | 1 | 16.32 |
| 420.7298 | M+2H | + | 2 | 26.72 |
| 421.2327 | M+H  | + | 1 | 18.76 |
| 423.2517 | M+H  | + | 1 | 22.55 |
| 424.4513 | M+H  | + | 1 | 25.73 |
| 425.2143 | M+H  | + | 1 | 21.02 |
| 425.2868 | M+H  | + | 1 | 21.63 |
| 427.3059 | M+H  | + | 1 | 20.95 |
| 428.3368 | M+H  | + | 1 | 20.83 |
| 429.3188 | M+H  | + | 1 | 18.88 |
| 429.3190 | M+Na | + | 1 | 19.03 |
| 431.3842 | 2M+H | + | 1 | 21.88 |
| 432.2804 | M+H  | + | 1 | 9.07  |
| 433.3314 | M+H  | + | 1 | 24.87 |
| 434.3605 | M+H  | + | 1 | 22.70 |
| 436.3998 | M+H  | + | 1 | 21.49 |
| 437.2356 | M+H  | + | 1 | 9.07  |
| 437.3740 | M+H  | + | 1 | 18.04 |
| 438.2176 | M+H  | + | 1 | 21.54 |
| 439.3182 | M+H  | + | 1 | 22.00 |
| 441.3215 | M+H  | + | 1 | 21.13 |
| 441.3936 | M+H  | + | 1 | 24.31 |
| 445.1200 | M+H  | + | 1 | 27.80 |
| 445.1201 | 2M+H | + | 1 | 25.95 |
| 445.1202 | M+H  | + | 1 | 27.17 |
| 445.1204 | M+H  | + | 1 | 25.95 |
| 445.1205 | M+H  | + | 1 | 24.37 |
| 453.4667 | M+H  | + | 1 | 27.57 |
| 455.3131 | M+H  | + | 1 | 24.86 |
| 455.4094 | M+H  | + | 1 | 24.96 |
| 457.3293 | M+H  | + | 1 | 20.88 |
| 459.3022 | M+H  | + | 1 | 24.00 |
| 459.3557 | M+H  | + | 1 | 18.03 |
| 467.4096 | M+H  | + | 1 | 27.22 |
| 468.3899 | M+H  | + | 1 | 18.95 |
| 475.4146 | M+H  | + | 1 | 25.59 |
| 476.2121 | M+H  | + | 1 | 22.01 |
| 476.3068 | M+H  | + | 1 | 8.88  |
| 476.3069 | M+H  | + | 1 | 9.27  |
| 477.4666 | M+H  | + | 1 | 27.21 |
| 480.2780 | M+H  | + | 1 | 10.53 |
| 481.2619 | M+H  | + | 1 | 9.28  |
| 481.2843 | M+H  | + | 1 | 24.01 |
| 482.4571 | M+H  | + | 1 | 24.90 |
| 482.8614 | M+2H | + | 2 | 20.38 |

|          |       |   |   |       |
|----------|-------|---|---|-------|
| 483.4410 | M+H   | + | 1 | 24.96 |
| 485.1129 | M+H   | + | 1 | 21.00 |
| 493.1455 | M+H   | + | 1 | 21.53 |
| 495.4772 | M+H   | + | 1 | 26.74 |
| 497.4572 | M+H   | + | 1 | 25.85 |
| 503.1076 | M+H   | + | 1 | 26.12 |
| 503.2966 | M+H   | + | 1 | 17.50 |
| 508.8569 | 2M+Na | + | 1 | 1.60  |
| 509.5298 | M+H   | + | 1 | 28.86 |
| 512.4161 | M+H   | + | 1 | 18.87 |
| 519.1392 | M+H   | + | 1 | 27.16 |
| 520.3326 | M+H   | + | 1 | 9.65  |
| 520.4365 | M+H   | + | 1 | 26.03 |
| 522.3850 | M+H   | + | 1 | 25.30 |
| 525.2880 | M+H   | + | 1 | 9.32  |
| 525.2883 | M+H   | + | 1 | 9.53  |
| 527.1924 | M+H   | + | 1 | 22.77 |
| 528.3085 | M+H   | + | 1 | 17.92 |
| 531.4048 | M+H   | + | 1 | 23.53 |
| 532.4111 | M+H   | + | 1 | 24.61 |
| 535.4699 | M+H   | + | 1 | 26.53 |
| 536.1656 | M+H   | + | 1 | 26.11 |
| 537.5359 | M+H   | + | 1 | 25.10 |
| 538.1448 | M+NH4 | + | 1 | 23.99 |
| 538.3140 | M+H   | + | 1 | 18.20 |
| 541.1208 | M+H   | + | 1 | 26.09 |
| 549.4125 | M+H   | + | 1 | 25.84 |
| 552.3300 | M+H   | + | 1 | 18.41 |
| 553.3906 | M+H   | + | 1 | 24.52 |
| 557.0944 | M+H   | + | 1 | 26.11 |
| 559.1317 | M+H   | + | 1 | 22.25 |
| 559.5181 | M+H   | + | 1 | 24.99 |
| 560.4711 | M+H   | + | 1 | 26.09 |
| 564.3592 | M+H   | + | 1 | 9.12  |
| 565.5672 | M+H   | + | 1 | 25.62 |
| 569.3840 | M+Na  | + | 1 | 25.30 |
| 575.5040 | M+H   | + | 1 | 31.28 |
| 577.1270 | M+H   | + | 1 | 26.82 |
| 577.4441 | M+H   | + | 1 | 26.34 |
| 579.2929 | M+H   | + | 1 | 19.88 |
| 579.4960 | M+H   | + | 1 | 26.33 |
| 593.1577 | M+H   | + | 1 | 27.79 |
| 593.1583 | M+H   | + | 1 | 23.40 |
| 593.1584 | M+H   | + | 1 | 29.45 |
| 593.5983 | M+H   | + | 1 | 26.18 |
| 607.5662 | M+H   | + | 1 | 27.37 |
| 608.3856 | M+H   | + | 1 | 9.93  |
| 610.1843 | M+H   | + | 1 | 26.83 |

|          |       |   |   |       |
|----------|-------|---|---|-------|
| 612.1818 | M+H   | + | 1 | 26.92 |
| 622.6137 | M+H   | + | 1 | 26.30 |
| 628.3749 | M+H   | + | 1 | 27.59 |
| 628.5002 | M+NH4 | + | 1 | 19.87 |
| 628.8602 | M+H   | + | 1 | 1.60  |
| 631.1140 | M+H   | + | 1 | 26.83 |
| 633.1501 | M+H   | + | 1 | 23.40 |
| 643.5275 | M+H   | + | 1 | 26.56 |
| 644.4952 | M+NH4 | + | 1 | 18.66 |
| 646.5266 | M+H   | + | 1 | 26.74 |
| 651.1454 | M+H   | + | 1 | 27.49 |
| 663.4539 | M+H   | + | 1 | 26.72 |
| 668.1770 | M+H   | + | 1 | 27.86 |
| 684.2031 | M+NH4 | + | 1 | 27.48 |
| 685.4357 | M+H   | + | 1 | 26.70 |
| 686.2005 | M+H   | + | 1 | 27.48 |
| 688.5215 | M+NH4 | + | 1 | 18.59 |
| 698.2551 | M+H   | + | 1 | 28.52 |
| 707.1691 | M+H   | + | 1 | 24.37 |
| 722.4907 | M+H   | + | 1 | 26.72 |
| 741.1942 | M+H   | + | 1 | 25.25 |
| 742.1967 | M+H   | + | 1 | 25.22 |
| 752.5590 | M+H   | + | 1 | 24.89 |
| 753.5666 | M+H   | + | 1 | 27.48 |
| 756.6351 | M+H   | + | 1 | 26.60 |
| 772.2736 | M+H   | + | 1 | 29.56 |
| 772.6296 | M+H   | + | 1 | 23.69 |
| 774.5433 | M+H   | + | 1 | 24.27 |
| 776.2327 | M+H   | + | 1 | 25.21 |
| 781.1874 | M+H   | + | 1 | 25.22 |
| 782.6503 | M+H   | + | 1 | 24.09 |
| 789.6678 | M+H   | + | 1 | 21.86 |
| 812.6970 | M+H   | + | 1 | 25.39 |
| 816.2159 | M+H   | + | 1 | 25.95 |
| 846.2922 | M+H   | + | 1 | 30.82 |
| 850.2513 | M+H   | + | 1 | 25.95 |
| 851.2526 | M+H   | + | 1 | 25.94 |
| 852.2510 | M+H   | + | 1 | 26.03 |
| 855.2052 | M+H   | + | 1 | 25.95 |
| 871.7355 | M+H   | + | 1 | 28.80 |
| 874.2509 | M+H   | + | 1 | 29.40 |
| 882.4929 | M+H   | + | 1 | 26.25 |
| 883.4951 | M+H   | + | 1 | 26.20 |
| 889.2329 | M+H   | + | 1 | 26.58 |
| 929.2236 | M+H   | + | 1 | 26.58 |
| 963.2515 | M+H   | + | 1 | 27.16 |
| 965.2501 | M+H   | + | 1 | 27.17 |



**Table S2.** Validation metrics of PLS-DA models.

| <b>Parameter<br/>of PLS-DA model</b> | <b>Tissue: Brain</b>            |         |       |
|--------------------------------------|---------------------------------|---------|-------|
| Class                                | BALB/c                          | C57BL/6 | CD1   |
| Data preprocessing                   | Log <sub>10</sub> , mean center |         |       |
| N                                    | 5                               | 5       | 5     |
| Number of LV                         | 3                               |         |       |
| RMSEC                                | 0.091                           | 0.132   | 0.127 |
| RMSECV                               | 0.120                           | 0.193   | 0.179 |
| <b>Tissue: Liver</b>                 |                                 |         |       |
| Class                                | BALB/c                          | C57BL/6 | CD1   |
| Data preprocessing                   | Log <sub>10</sub> , mean center |         |       |
| N                                    | 5                               | 5       | 5     |
| Number of LV                         | 3                               |         |       |
| RMSEC                                | 0.133                           | 0.128   | 0.141 |
| RMSECV                               | 0.174                           | 0.186   | 0.225 |
| <b>Tissue: Kidney</b>                |                                 |         |       |
| Class                                | BALB/c                          | C57BL/6 | CD1   |
| Data preprocessing                   | Log <sub>10</sub> , mean center |         |       |
| N                                    | 5                               | 5       | 5     |
| Number of LV                         | 4                               |         |       |
| RMSEC                                | 0.067                           | 0.093   | 0.105 |
| RMSECV                               | 0.160                           | 0.218   | 0.209 |
| <b>Tissue: Muscle</b>                |                                 |         |       |
| Class                                | BALB/c                          | C57BL/6 | CD1   |
| Data preprocessing                   | Log <sub>10</sub> , mean center |         |       |
| N                                    | 5                               | 5       | 5     |
| Number of LV                         | 2                               |         |       |
| RMSEC                                | 0.092                           | 0.216   | 0.184 |
| RMSECV                               | 0.142                           | 0.279   | 0.259 |

**Table S3.** Metabolic pathways and involved metabolites differentiating tissues of C57BL/6, BALB/c and CD1 mouse strains.

| <b>Pathway name</b>                         | <b>Compound</b>                                                |
|---------------------------------------------|----------------------------------------------------------------|
| Pantothenate and CoA biosynthesis           | Pantothenic acid<br>Valine<br>Uracil                           |
| Aminoacyl-tRNA biosynthesis                 | Asparagine<br>Valine<br>Proline                                |
| Valine, leucine and isoleucine biosynthesis | Valine                                                         |
| Beta-alanine metabolism                     | Uracil                                                         |
| Glutathione metabolism                      | Pyroglutamic acid                                              |
| Cysteine and methionine metabolism          | Cystine                                                        |
| Valine, leucine and isoleucine degradation  | Valine                                                         |
| Tryptophan metabolism                       | 2-aminobenzoic acid                                            |
| Arginine and proline metabolism             | Proline                                                        |
| Pyrimidine metabolism                       | 2'- deoxycytidine<br>Uracil                                    |
| Alanine, aspartate and glutamate metabolism | N-acetylaspartic acid<br>Asparagine                            |
| Purine metabolism                           | Xanthine<br>Adenosine monophosphate (AMP)<br>5-hydroxyisourate |
| Terpenoid backbone biosynthesis             | Mevalonic acid                                                 |
| Sphingolipid metabolism                     | Ceramide (d40:1)                                               |

**Table S4.** Isotope pattern matching analysis of differential metabolites using the ChemSpider database.

| Compound                    | Molecular weight | ChemSpider results | Full match | $\Delta$ mass [ppm] | Matched/ missed isotopes | Sfit [%] | Pattern Coverage [%] |
|-----------------------------|------------------|--------------------|------------|---------------------|--------------------------|----------|----------------------|
| Uracil                      | 112.0276         | 3                  | 1          | 2.42                | 3/0                      | 81       | 99.61                |
| Proline*                    | 115.0636         | 8                  | 1          | 2.23                | 2/0                      | 91       | 99.05                |
| Valine*                     | 117.0792         | 14                 | 1          | 2.14                | 5/0                      | 65       | 99.87                |
| Pyroglutamic acid*          | 129.0427         | 11                 | 1          | 0.43                | 5/0                      | 86       | 100                  |
| Asparagine                  | 132.0536         | 8                  | 1          | 0.81                | 2/0                      | 92       | 98.62                |
| 2-aminobenzoic acid         | 137.0476         | 15                 | 1          | -0.45               | 5/0                      | 60       | 100                  |
| Mevalonic acid              | 148.0737         | 28                 | 1          | 0.83                | 1/0                      | 100      | 93.06                |
| Xanthine*                   | 152.0334         | 3                  | 1          | -0.01               | 2/0                      | 84       | 98.13                |
| Allantoin                   | 158.0439         | 2                  | 1          | -0.80               | 2/0                      | 54       | 98.03                |
| N-acetylvaline              | 159.0896         | 18                 | 1          | 0.57                | 2/0                      | 84       | 98.86                |
| Tetrahydrodipicolinate      | 171.0532         | 4                  | 1          | 0.09                | 2/0                      | 97       | 98.56                |
| N-acetylaspartic acid       | 175.0481         | 4                  | 1          | -0.06               | 4/0                      | 81       | 100                  |
| 5-hydroxyisourate           | 184.0233         | 2                  | 2          | 0.42                | 2/0                      | 61       | 97.86                |
| Pantothenic acid            | 219.1107         | 2                  | 1          | 0                   | 2/0                      | 86       | 98.59                |
| 2'-deoxycytidine            | 227.0905         | 3                  | 3          | -0.44               | 4/0                      | 81       | 100                  |
| Cystine                     | 240.0237         | 3                  | 1          | -0.69               | 2/0                      | 90       | 92.84                |
| 2-methylbutyrylcarnitine    | 245.1627         | 4                  | 1          | 0.06                | 2/0                      | 95       | 98.59                |
| Inosine*                    | 268.0807         | 6                  | 1          | -0.42               | 4/0                      | 67       | 99.90                |
| N-tridecanoylglycine        | 271.2147         | 1                  | 1          | -0.58               | 2/0                      | 93       | 98.59                |
| Oleamide*                   | 281.2718         | 3                  | 1          | -0.29               | 4/0                      | 66       | 100                  |
| 8-hydroxydeoxyguanosine     | 283.0916         | 6                  | 1          | -0.41               | 3/0                      | 65       | 98.75                |
| Ethyl eicosapentaenoic acid | 330.2557         | 14                 | 2          | -0.58               | 2/0                      | 87       | 97.43                |
| Adenosine monophosphate*    | 347.0629         | 9                  | 2          | -0.49               | 3/0                      | 78       | 99.85                |
| Ceramide (d40:1)            | 621.6063         | 2                  | 1          | 0.43                | 4/0                      | 70       | 99.87                |

Sfit – Spectral similarity score between theoretical and measured isotope pattern in %

\* Fragmentation spectrum confirmed with mzCloud database.
